# Supplementary material
Source: publisher figshare collection journal article supplement (https://geolsoc.figshare.com/ndownloader/files/35155667)
Supplement: Supplementary file 1 [file 35155667]

## Sheet: Supplementary Material 4
Joana Alexandra Ferreira1,2*; Inês Pereira3,4; Telmo Bento dos Santos1,2; João Mata1,2
1IDL - Instituto Dom Luiz, Faculdade de Ciências, Universidade de Lisboa, Campo Grande, 1749-016 Lisboa, Portugal
2 Departamento de Geologia, Faculdade de Ciências, Universidade de Lisboa, C6, Campo Grande, 1749-016 Lisboa, Portugal
3Université Clermont Auvergne, CNRS, IRD, OPGC, Laboratoire Magmas et Volcans, F-63000 Clermont-Ferrand, France
4School of Earth and Environmental Sciences, University of Portsmouth, Building Burnaby Rd Portsmouth P01 3QL, UK
*Correspondence (jaferreira@fc.ul.pt)
Supplementary Material 4. U-Pb zircon and apatite data of the Figueira de Castelo Rodrigo - Lumbrales Anatectic Complex migmatites; U-Pb detrital zircon data of the Douro- Beiras Supergroup (DBSG)

## Sheet: Migmatites U-Pb Zircon Data
Table 1 – LA-ICP-MS U–Pb zircon data of the Figueira de Castelo Rodrigues – Lumbrales Anatectic Complex migmatites.
				Common-lead uncorrected					Final Ages (Ma)
Id	U (ppm)	Th (ppm)	Th/U	207Pb/235U	±2σ	206Pb/238U	±2σ	Rho	207Pb/235U	±2σ	206Pb/238U	±2σ	207Pb/206Pb	±2σ	Concordance (%)*
Metatexite (JTJ-25)
M6_25_10e	1281	3.88	0.00302888	0.357	0.011	0.04929	0.00064	0.28711	308.7	7.9	310.1	3.9	263	62	100.454
M6_25_2e	1873	3.9	0.00208222	0.3685	0.0099	0.04953	0.00063	0.25364	317.2	7.4	311.6	3.9	326	58	98.2346
M6_25_1e	1550	3.87	0.00249677	0.366	0.011	0.04969	0.0006	0.20529	315.1	8	312.5	3.7	307	63	99.1749
M6_25_2c	1382	3.89	0.00281476	0.3605	0.016	0.04994	0.001	0.001	312.1	12	314.1	6.2	283	97	100.641
M6_25_3c	1289	5.21	0.00404189	0.3592	0.016	0.05005	0.001	0.001	311.5	12	314.8	6.2	272	98	101.059
M6_25_4c	1458	4.32	0.00296296	0.359	0.015	0.05009	0.001	0.001	311.1	11	315	6.2	275	99	101.254
M6_25_10c	1392	4.21	0.00302443	0.3554	0.015	0.05009	0.001	0.001	308.3	11	315.1	6.1	246	98	102.206
M6_25_5c	1252	3.988	0.0031853	0.3603	0.016	0.05014	0.001	0.001	311.9	12	315.4	6.2	275	98	101.122
M6_25_1c	1394	5.56	0.00398852	0.3563	0.015	0.05019	0.001	0.001	309	11	315.7	6.3	263	97	102.168
M2_25_2	1378	4.46	0.00323657	0.373	0.012	0.05031	0.0015	0.0015	321	9.1	316.3	9.3	319	70	98.5358
M6_25_6c	2027	5.61	0.00276764	0.3618	0.015	0.05045	0.001	0.001	313.2	11	317.3	6.3	276	97	101.309
M2_25_1	1455	4.41	0.00303093	0.3699	0.0061	0.05073	0.00068	0.00068	319.2	4.5	319	4.2	321	30	99.9373
M6_25_7c	1047.4	3.44	0.00328432	0.3614	0.016	0.05097	0.0011	0.0011	312.7	12	320.4	6.5	253	99	102.462
Metatexite (JTJ-20)
M1_20_32F	1116	293.7	0.263172	0.583	0.011	0.07147	0.0016	0.0016	465.4	6.8	444.9	9.9	543	69	95.5952
M1_20_75a	1728	355	0.20544	0.661	0.065	0.077	0.0018	0.0018	512	40	477.8	11	633	180	93.3203
M1_20_51	60.15	39.85	0.66251	0.684	0.028	0.0786	0.0019	0.0019	524	17	487.4	11	656	110	93.0153
M1_20_52	861	180.8	0.209988	0.658	0.011	0.07959	0.0018	0.0018	512.6	7	493.6	11	584	69	96.2934
M1_20_79a	1931	2860	1.4811	0.698	0.068	0.0834	0.002	0.002	535.4	41	516.4	12	580	180	96.4513
M1_20_11	952	271.2	0.284874	0.692	0.012	0.08512	0.0019	0.0019	532.5	7.2	526.5	11	559	69	98.8732
M1_20_24	2563	409.4	0.159735	0.7136	0.0086	0.08674	0.0019	0.0019	546.3	5.1	536.1	11	581	62	98.1329
M1_20_32I	984	403.5	0.410061	0.733	0.02	0.0874	0.0026	0.0026	557	12	540	15	600	77	96.9479
M1_20_34	468.6	92.91	0.198271	0.714	0.015	0.08875	0.002	0.002	545.2	8.9	548	12	504	75	100.514
M1_20_19	765	236.6	0.309281	0.716	0.013	0.08882	0.0013	0.0013	547.2	7.6	548.5	7.4	531	34	100.238
M1_20_3	319	205.7	0.644828	0.72	0.021	0.0888	0.0021	0.0021	548	12	548.5	12	519	85	100.091
M1_20_69a	1992	671	0.336847	0.748	0.073	0.0892	0.002	0.002	564	42	550.9	12	595	180	97.6773
M1_20_65	741	246	0.331984	0.736	0.013	0.0895	0.002	0.002	558.9	7.8	552.2	12	577	67	98.8012
M1_20_66	315.4	170.8	0.541535	0.73	0.017	0.08947	0.002	0.002	554	10	552.3	12	549	74	99.6931
M1_20_8	541.6	185.7	0.342873	0.725	0.015	0.08952	0.0013	0.0013	552.1	9	552.6	7.7	546	42	100.091
M1_20_68	613.9	263.9	0.429875	0.724	0.013	0.0898	0.002	0.002	551.7	7.5	554.2	12	547	71	100.453
M1_20_36	707	214.9	0.30396	0.741	0.013	0.0905	0.002	0.002	561.2	7.7	558.3	12	572	67	99.4833
M1_20_48	402	113	0.281095	0.737	0.014	0.09066	0.002	0.002	559.2	8.1	559.4	12	536	73	100.036
M1_20_22	258.2	58.3	0.225794	0.737	0.02	0.0911	0.0014	0.0014	558	12	561.9	8.5	508	60	100.699
M1_20_43	421.9	221.8	0.525717	0.742	0.015	0.0912	0.0021	0.0021	561.6	8.8	562.3	12	540	74	100.125
M1_20_64	430	142	0.330233	0.746	0.015	0.09136	0.002	0.002	564.1	8.9	563.5	12	553	73	99.8936
M1_20_62	196.6	130.1	0.66175	0.757	0.019	0.0918	0.0021	0.0021	569	11	565.8	12	559	80	99.4376
M1_20_55	570.5	237.7	0.416652	0.754	0.013	0.09178	0.002	0.002	569.1	7.7	565.9	12	574	68	99.4377
M1_20_77a	765	291.4	0.380915	0.723	0.074	0.0923	0.0022	0.0022	547	45	568.9	13	409	190	104.004
M1_20_4	183.8	55.78	0.303482	0.761	0.025	0.0925	0.0015	0.0015	570	14	570.1	8.8	539	70	100.018
M1_20_58	199.3	106	0.531862	0.742	0.02	0.0926	0.0022	0.0022	563	12	570.5	13	537	83	101.332
M1_20_80a	2295	835	0.363834	0.747	0.073	0.0926	0.0021	0.0021	564	42	570.7	12	524	180	101.188
M1_20_41	4432	891.9	0.201241	0.7471	0.0078	0.09281	0.002	0.002	566.1	4.5	572.1	12	545	61	101.06
M1_20_30	178	91.8	0.51573	0.748	0.023	0.093	0.0022	0.0022	563	13	573	13	471	87	101.776
M1_20_47	221.9	64.35	0.289995	0.755	0.019	0.0934	0.0022	0.0022	568	11	575.4	13	515	80	101.303
M1_20_27	204.5	66.6	0.325672	0.788	0.02	0.0935	0.0022	0.0022	589	12	575.7	13	607	82	97.7419
M1_20_40	640.3	303.2	0.473528	0.766	0.013	0.0935	0.002	0.002	577.8	7.3	576.1	12	572	69	99.7058
M1_20_16	770	561	0.728571	0.798	0.016	0.094	0.0014	0.0014	593.7	9	578.8	8.3	641	33	97.4903
M1_20_45	568.1	224.9	0.395881	0.772	0.015	0.0943	0.0021	0.0021	578.9	8.5	580.9	13	567	68	100.345
M1_20_73a	350.2	171.3	0.489149	0.746	0.081	0.0944	0.0025	0.0025	557	49	581	15	410	200	104.309
M1_20_18	324.3	170.1	0.524514	0.784	0.019	0.09539	0.0014	0.0014	585	11	587.2	8.3	549	49	100.376
M1_20_54	167.7	147.6	0.880143	0.804	0.025	0.0966	0.0022	0.0022	596	14	594.3	13	565	85	99.7148
M1_20_71a	2178	1564	0.71809	0.779	0.076	0.097	0.0022	0.0022	583.8	42	597.4	13	529	180	102.33
M1_20_57	1678	686	0.40882	0.823	0.011	0.09729	0.0021	0.0021	608.9	5.9	598.4	12	676	61	98.2756
M1_20_9	179.1	66.79	0.37292	0.794	0.024	0.0978	0.0017	0.0017	590	13	601.5	9.8	523	63	101.949
M1_20_63	2057	550.4	0.267574	0.8262	0.0093	0.09844	0.0021	0.0021	610.9	5.1	605.1	13	623	62	99.0506
M1_20_39	1164	332.3	0.285481	0.839	0.012	0.09962	0.0022	0.0022	617.7	6.7	612.1	13	648	62	99.0934
M1_20_74a	149.3	43.14	0.288948	0.849	0.11	0.1003	0.0035	0.0035	588	60	615	21	380	230	104.592
M1_20_42	1390	128.9	0.0927338	0.8315	0.0098	0.10025	0.0022	0.0022	614.3	5.5	615.8	13	612	62	100.244
M1_20_53	1675	564.5	0.337015	0.844	0.01	0.10088	0.0022	0.0022	620.9	5.6	619.5	13	622	62	99.7745
M1_20_21	826	532.6	0.644794	0.851	0.015	0.10149	0.0014	0.0014	623.7	8	623.6	8.3	609	33	99.984
M1_20_15	2159	529.3	0.24516	0.8497	0.012	0.10195	0.0014	0.0014	623.9	6.4	625.7	8	619	21	100.289
M1_20_25	312.2	328.3	1.05157	0.858	0.019	0.1021	0.0023	0.0023	627	10	626.3	13	599	76	99.8884
M1_20_10I	586.6	266.9	0.454995	0.853	0.016	0.1023	0.0015	0.0015	626	9.3	627.8	8.8	628	40	100.288
M1_20_38	168.9	95.9	0.567792	0.941	0.032	0.1034	0.0024	0.0024	668	17	633.9	14	762	92	94.8952
M1_20_61	183.1	105.8	0.577826	0.879	0.022	0.1045	0.0024	0.0024	637	12	640.3	14	605	82	100.518
M1_20_49	132.1	189.1	1.43149	0.888	0.029	0.1056	0.0026	0.0026	640	15	647	15	577	94	101.094
M1_20_12	456	352.6	0.773246	0.89	0.019	0.1063	0.0015	0.0015	644.3	10	651.1	8.9	616	41	101.055
M1_20_72	429	214	0.498834	0.871	0.092	0.1069	0.0027	0.0027	627	50	654	16	500	190	104.306
M1_20_70a	375.9	396	1.05347	0.881	0.093	0.1075	0.0027	0.0027	632	50	658	16	496	190	104.114
M1_20_6	45.32	12.77	0.281774	0.856	0.054	0.1078	0.0023	0.0023	611	30	659	13	370	130	107.856
M1_20_37	505.1	145.9	0.288854	0.929	0.016	0.1084	0.0024	0.0024	665.2	8.3	663.4	14	668	69	99.7294
M1_20_1	665.1	468.5	0.704405	0.932	0.014	0.1105	0.0024	0.0024	668.3	7.2	675.5	14	656	64	101.077
M1_20_13	484.5	295.4	0.609701	1.008	0.018	0.1165	0.0017	0.0017	707.2	9.1	710.4	9.7	686	36	100.452
M1_20_20	240.2	69.49	0.289301	1.076	0.026	0.1202	0.0018	0.0018	738	13	731.5	10	727	49	99.1192
M1_20_23	79.9	31.03	0.38836	1.23	0.046	0.1304	0.0028	0.0028	804	21	789	16	819	75	98.1343
M1_20_35	200.8	175.7	0.875	1.227	0.029	0.134	0.0032	0.0032	810	13	811	18	792	78	100.123
M1_20_44	2205	140.9	0.0639002	1.33	0.016	0.1348	0.003	0.003	857.8	6.9	814.7	17	975	56	94.9755
M1_20_2	356	123.1	0.345787	1.269	0.022	0.1363	0.0031	0.0031	831	10	823.7	17	855	65	99.1215
M1_20_5	236.3	273.5	1.15743	5.618	0.084	0.3342	0.0047	0.0047	1917	13	1858	23	1982	21	93.7437
M1_20_7	86.4	26.08	0.301852	7.03	0.13	0.38	0.0059	0.0059	2113	17	2075	28	2144	28	96.7817
Metatexite (JTJ-60A)
M7_60A_30c	716	585.5	0.817737	0.648	0.022	0.07835	0.0013	0.0013	506.3	14	486.1	8.1	585	67	96.0103
M7_60A_11c	567.1	112.7	0.19873	0.712	0.025	0.08164	0.0014	0.0014	544.4	15	505.8	8.1	707	62	92.9096
M7_60A_8c	381.4	71.6	0.187729	0.749	0.034	0.0841	0.0023	0.0023	562	20	520	14	717	73	92.5267
M7_60A_19c	236.5	211.2	0.893023	0.714	0.029	0.0862	0.0016	0.0016	544	17	532.7	9.3	566	81	97.9228
M7_60A_1c	290.1	162.9	0.561531	0.704	0.028	0.0872	0.0016	0.0016	538	17	539	9.3	502	78	100.186
M4_60A_10	406.1	169.1	0.4164	0.719	0.031	0.0896	0.0028	0.0028	545	19	552.8	17	434	94	101.431
M7_60A_17c	1163	628	0.539983	0.775	0.025	0.09018	0.0014	0.0014	581.5	15	556.5	8.4	669	60	95.7008
M7_60A_7c	202.1	327.3	1.6195	0.729	0.03	0.0903	0.0017	0.0017	555	18	557.3	9.9	508	85	100.414
M7_60A_14c	570.2	515.5	0.904069	0.744	0.026	0.09076	0.0015	0.0015	563.1	15	559.9	8.7	556	68	99.4317
M7_60A_24c	325	144	0.443077	0.749	0.029	0.092	0.0016	0.0016	565	17	567.1	9.4	535	75	100.372
M7_60A_22c	859	206.3	0.240163	0.749	0.025	0.09202	0.0015	0.0015	566.7	14	567.4	8.9	553	63	100.124
M7_60A_29c	1099	510.8	0.464786	0.752	0.025	0.0927	0.0015	0.0015	568.6	14	571.4	9	550	61	100.492
M7_60A_5c	914	406.7	0.444967	0.78	0.026	0.09458	0.0015	0.0015	584.6	15	582.5	8.8	582	62	99.6408
M7_60A_2c	530.7	459.8	0.866403	0.816	0.028	0.09481	0.0015	0.0015	605.1	16	583.8	9.1	671	63	96.4799
M7_60A_26c	444.5	389.2	0.875591	0.784	0.028	0.09491	0.0016	0.0016	585.8	16	584.4	9.3	578	68	99.761
M7_60A_12c	146.6	175.8	1.19918	0.803	0.036	0.0954	0.0019	0.0019	593	20	588.2	11	570	91	99.1906
M7_60A_15c	860.8	636.9	0.739893	0.799	0.026	0.09578	0.0015	0.0015	596.1	15	589.5	8.9	620	62	98.8928
M7_60A_13c	682.5	591.8	0.867106	0.807	0.028	0.09653	0.0016	0.0016	599	16	593.9	9.4	612	64	99.1486
M7_60A_10c	329.6	312	0.946602	0.833	0.031	0.0966	0.0019	0.0019	613	17	594.1	11	668	73	96.9168
M4_60A_3	296.5	341.9	1.15312	0.837	0.022	0.0991	0.0015	0.0015	614	12	608.9	9	597	56	99.1694
M4_60A_20	458	530	1.15721	0.789	0.028	0.0997	0.0031	0.0031	586	16	613.3	18	508	82	104.659
M7_60A_28c	241.7	154	0.637153	0.829	0.032	0.1004	0.0018	0.0018	610	18	616.8	10	556	79	101.115
M4_60A_19	695	636	0.915108	0.815	0.028	0.1013	0.003	0.003	599	16	621.8	18	539	73	103.806
M4_60A_9	423.1	540	1.27629	0.839	0.036	0.1016	0.0032	0.0032	609	20	624	19	473	95	102.463
M4_60A_14a	383	453	1.18277	0.846	0.041	0.1023	0.0032	0.0032	612	23	627	19	470	110	102.451
M4_60A_5	342.1	220.8	0.645425	0.863	0.018	0.1022	0.0015	0.0015	629.9	9.9	627.4	8.9	611	45	99.6031
M4_60A_2	512.6	617	1.20367	0.874	0.018	0.1037	0.0016	0.0016	636.5	9.7	635.8	9.1	616	38	99.89
M4_60A_4	344	213.9	0.621802	0.904	0.02	0.1052	0.0016	0.0016	653	11	644.9	9.1	654	46	98.7596
M7_60A_21c	287.2	143	0.497911	1.016	0.04	0.1077	0.0024	0.0024	708	20	659	14	854	68	93.0791
M4_60A_8	254	268	1.05512	0.857	0.055	0.1081	0.0036	0.0036	613	31	661	21	350	130	107.83
M4_60A_17	396	343	0.866162	0.914	0.042	0.1085	0.0035	0.0035	648	22	664	20	601	99	102.469
M4_60A_13a	309.7	201.8	0.651598	1.128	0.053	0.1273	0.004	0.004	754	26	772	23	610	100	102.387
M4_60A_15a	2039	225.1	0.110397	1.327	0.024	0.1386	0.0041	0.0041	857	11	837	23	903	30	97.6663
M4_60A_1	431.8	214.2	0.496063	1.351	0.024	0.1409	0.002	0.002	865.7	11	849.8	11	899	33	98.1633
M4_60A_6	320.7	196.3	0.612099	1.684	0.031	0.1666	0.0024	0.0024	1000	12	993.1	13	1000	32	99.31
M4_60A_7	125.1	73.9	0.590727	7.65	0.12	0.4019	0.0062	0.0062	2187	14	2176	28	2185	23	99.5881
M7_60A_9c	199.9	148.8	0.744372	21.28	0.67	0.5898	0.0097	0.0097	3149	30	2987	39	3253	42	91.8229
Diatexite (JTJ-24A)
M1_24A_5	8790	7.24	0.000823663	0.4002	0.0066	0.05387	0.0015	0.0015	341.2	4.8	338.2	9.4	344	33	99.1208
M1_24A_38	10900	30.7	0.00281651	0.413	0.0074	0.05461	0.0016	0.0016	350.4	5.3	342.7	9.8	361	34	97.8025
M1_24A_48	12370	28.9	0.0023363	0.4004	0.0057	0.05474	0.0016	0.0016	341.5	4.1	343.5	9.6	317	29	100.586
M1_24A_18	2980	67.3	0.0225839	0.651	0.016	0.08465	0.0013	0.0013	508.4	9.5	523.7	7.8	437	36	103.009
M1_24A_39	602	160.7	0.266944	0.704	0.031	0.0853	0.003	0.003	535	19	527	18	522	96	98.5047
M1_24A_22a	773.2	754	0.975168	0.751	0.02	0.09189	0.0013	0.0013	567	11	566.6	7.6	549	47	99.9295
M1_24A_20	803.2	288	0.358566	0.742	0.018	0.09201	0.0013	0.0013	562.6	11	567.3	7.9	524	41	100.835
M1_24A_12	432.6	176.2	0.407305	0.754	0.022	0.09301	0.0014	0.0014	569.5	12	573.2	8.1	522	54	100.65
M1_24A_30	246.4	543.9	2.20739	0.78	0.026	0.0946	0.0015	0.0015	583	15	582.4	8.9	555	63	99.8971
M1_24A_7	298.2	157.1	0.526828	0.778	0.038	0.0957	0.0014	0.0014	581	21	588.9	8.1	547	93	101.36
M1_24A_28	397.7	88.4	0.222278	0.794	0.022	0.09608	0.0014	0.0014	591.3	12	591.3	8.2	574	52	100
M1_24A_27	140.6	140	0.995733	0.794	0.03	0.0977	0.0016	0.0016	589	17	601	9.2	517	79	102.037
M1_24A_9	127.5	197.7	1.55059	0.826	0.033	0.0998	0.0018	0.0018	607	18	613.2	10	531	80	101.021
M1_24A_16	312.8	323.9	1.03549	0.831	0.027	0.1005	0.0017	0.0017	611	15	617.3	9.9	553	62	101.031
M1_24A_31	421.7	372.5	0.883329	0.857	0.024	0.1015	0.0015	0.0015	626	13	623	8.6	625	51	99.5208
M1_24A_26	280.1	321.8	1.14888	0.848	0.028	0.1028	0.0016	0.0016	622	15	630.4	9.4	564	61	101.35
M1_24A_44a	1225	914	0.746122	0.928	0.024	0.1041	0.0031	0.0031	664	12	638.2	18	740	52	96.1145
M1_24A_47a	666	720	1.08108	0.961	0.032	0.1055	0.0031	0.0031	679	17	646.3	18	749	74	95.1841
M1_24A_10	336.1	115.8	0.34454	5.671	0.12	0.3407	0.0047	0.0047	1924.8	19	1889	22	1957	26	96.5253
M1_24A_24	267	97.8	0.366292	5.974	0.13	0.361	0.0051	0.0051	1970	20	1986	24	1953	28	101.69
M1_24A_46	242	152.2	0.628926	6.99	0.15	0.3933	0.012	0.012	2103	19	2135	56	2082	37	102.546
M1_24A_8	574.1	386	0.672357	7.382	0.28	0.3954	0.0047	0.0047	2157	34	2147	22	2178	55	98.5767
M1_24A_21	453	229.9	0.507506	9.9	0.21	0.4457	0.006	0.006	2424.7	19	2375	27	2462	22	96.4663
M1_24A_3	145.3	67.8	0.466621	12.84	0.48	0.5089	0.0067	0.0067	2666	36	2650	29	2668	52	99.3253
M1_24A_45a	1372	1987	1.44825	15.07	0.25	0.5257	0.016	0.016	2820	15	2719	69	2907	17	93.5329
Diatexite (JTJ-43)
M7_43_10e	1137	8.26	0.00726473	0.395	0.016	0.05169	0.0012	0.21349	335	11	324.8	7.3	331	86	96.9552
M7_43_1e	748	8.2	0.0109626	0.383	0.018	0.05228	0.0013	0.083957	325	13	328.4	8	271	100	101.046
M7_43_12e	5640	5.23	0.000927305	0.3822	0.0069	0.05272	0.0011	0.38709	328	5	331.1	7	281	50	100.945
M7_43_8c	405	365	0.901235	0.779	0.028	0.09388	0.0016	0.0016	583.7	16	578.3	9.3	576	71	99.0749
M7_43_3c	626.9	189.4	0.302122	0.817	0.029	0.09758	0.0016	0.0016	604.6	16	600.1	9.3	602	67	99.2557
M7_43_2c	376.9	118.6	0.314672	0.845	0.03	0.0993	0.0017	0.0017	620.7	16	610.3	9.8	639	70	98.3245
M7_43_1c	228	420.8	1.84561	0.815	0.033	0.0996	0.0018	0.0018	603	18	612.1	10	536	79	101.509
M7_43_5c	387.8	301.5	0.777463	0.992	0.035	0.1132	0.0018	0.0018	697.5	18	691	11	707	65	99.0681
M7_43_4c	490	184.3	0.376122	0.967	0.033	0.11319	0.0018	0.0018	687.2	17	691.1	10	660	63	100.568
M7_43_14c	236.8	94.6	0.399493	11.99	0.37	0.4857	0.0077	0.0077	2603.1	29	2551	33	2643	42	96.5191
Diatexite (JTJ-55)
M6_55_22e	3108	2.58	0.000830116	0.3597	0.028	0.04952	0.0011	0.35399	311.2	21	311.5	6.9	289	180	100.096
M6_55_12e	2534	3.25	0.00128256	0.3697	0.029	0.05061	0.0012	0.33531	319.1	22	318.2	7.2	305	180	99.718
M6_55_27e	3286	2.88	0.000876446	0.3742	0.029	0.05071	0.0012	0.37531	321.9	22	318.8	7.1	316	180	99.037
M6_55_8e	2427	2.04	0.000840544	0.3858	0.03	0.05096	0.0012	0.2678	330.2	22	320.4	7.1	376	180	97.0321
M6_55_10e	1174	14.97	0.0127513	0.371	0.031	0.05098	0.0012	0.22793	319.5	23	320.5	7.4	281	180	100.313
M6_55_12c	1103	14.08	0.0127652	0.3667	0.016	0.0511	0.0011	0.0011	317.2	12	321.2	6.5	270	100	101.261
M6_55_30e	2817	2.56	0.000908768	0.377	0.03	0.05113	0.0011	0.25314	323.8	22	321.4	7	317	170	99.2588
M6_55_37c	694	9.69	0.0139625	0.589	0.026	0.07302	0.0015	0.0015	468.7	17	454.8	9.3	535	99	97.0344
M6_55_36c	394.9	133.2	0.337301	0.576	0.027	0.07418	0.0016	0.0016	460.1	17	461.2	9.6	449	110	100.239
M6_55_38c	474.5	10.65	0.0224447	0.594	0.027	0.07484	0.0016	0.0016	472.7	18	465.1	9.4	498	100	98.3922
M6_55_13c	326.1	26.4	0.0809568	0.6	0.028	0.07613	0.0017	0.0017	475.2	18	472.9	10	451	100	99.516
M6_55_7c	308	73.3	0.237987	0.619	0.03	0.07764	0.0017	0.0017	487	19	481.9	9.9	487	110	98.9528
M6_55_18c	372.6	45.85	0.123054	0.632	0.029	0.08019	0.0017	0.0017	495	18	497.2	10	463	100	100.444
M6_55_27c	440.3	82.9	0.188281	0.678	0.031	0.08147	0.0017	0.0017	523.8	19	504.8	10	610	100	96.3727
M6_55_41c	2665	957	0.359099	0.7299	0.03	0.08735	0.0018	0.0018	555.9	18	539.8	10	633	90	97.1038
M6_55_24c	410.9	275.4	0.670236	0.839	0.038	0.098	0.0021	0.0021	617	21	602.3	12	667	100	97.6175
M6_55_28c	408.8	321.1	0.78547	1.314	0.059	0.1261	0.0033	0.0033	850	25	765	19	1096	89	90
M6_55_22c	61.1	26.14	0.427823	6.95	0.3	0.3766	0.0081	0.0081	2101	40	2059	38	2152	80	95.6784
	*Concordance = (206Pb/238U age) / (207Pb/235U age) x 100 *Concordance (inherited ages) = (206Pb/238U age) / (207Pb/235U age) x 100 – for ages <1000 Ma = (206Pb/238U age) / (207Pb/206Pb age) x 100 – for ages >1000 Ma

## Sheet: Migmatites U-Pb Apatite Data
	Table 2 – LA-ICP-MS U–Pb apatite data of the Figueira de Castelo Rodrigues – Lumbrales Anatectic Complex migmatites.
									Final Ages (Ma)
Id	U (ppm)	Pb (ppm)	206Pbcm	238U/206Pb	±2σ	207Pb/206Pb	±2σ	Rho	207Pb/235U	±2σ	206Pb/238U	±2σ
Metatexite (JTJ-20) Lat: 40.889 Long: -7.032
M1_20_1	115.25	11.403	0.353674	12.9182	0.283697	0.3494	0.0027	0.55467	1576.5	18	480.6	10
M1_20_3	164	14.52	0.331458	13.4753	0.290533	0.325	0.0024	0.40443	1486.6	17	461.4	9.6
M1_20_6	167.5	12.876	0.294367	14.1523	0.30043	0.304	0.0022	0.46751	1397.1	16	440.1	9.1
M1_20_7	178.3	15.24	0.320747	13.7137	0.282097	0.3225	0.0023	0.51058	1466.2	17	453.7	9.3
M1_20_11	198.8	11.02	0.235852	15.2137	0.347187	0.2505	0.0024	0.41534	1201.3	17	410.4	9
M1_20_12	246.4	10.96	0.18799	15.9591	0.356572	0.2188	0.002	0.52924	1076.8	15	391.8	8.6
M1_20_13	134.84	14.54	0.36658	12.3472	0.274416	0.3627	0.0034	0.50563	1642.3	19	502	11
M1_20_15	186.1	16.6	0.326969	13.344	0.302706	0.3322	0.0025	0.44278	1511.4	18	465.8	10
Metatexite (JTJ-25) Lat: 40.882 Long: -7.083
M2_25_1	109.35	12.858	0.413166	12.2234	0.254001	0.3832	0.0027	0.50932	1696.3	18	506.9	10
M2_25_10	79.83	16.14	0.532856	9.37207	0.202022	0.4859	0.0031	0.56561	2129.3	19	653.5	13
M2_25_2	102.02	13.548	0.43289	11.5473	0.253348	0.4079	0.0029	0.52865	1796.5	17	535.4	11
M2_25_3	102.56	28.08	0.60466	7.88022	0.167664	0.549	0.003	0.42679	2397	20	770.1	16
M2_25_4	95.98	14.529	0.472154	10.8401	0.235016	0.4328	0.0032	0.46385	1899.6	19	568.8	12
M2_25_5	96.4	13.295	0.429741	11.3033	0.242751	0.4132	0.0028	0.46379	1825.2	18	546.4	11
M2_25_6	91.33	23.95	0.608032	8.14598	0.172528	0.5424	0.0034	0.53763	2354.6	19	746.4	15
M2_25_7	110.4	20.83	0.527067	9.84543	0.213251	0.4811	0.0029	0.51829	2076.8	19	623.6	13
M2_25_8	105.03	20.66	0.520531	9.56846	0.201422	0.487	0.0031	0.59252	2112.1	19	640.7	13
M2_25_9	113.81	17.882	0.460401	10.6259	0.225818	0.4387	0.0027	0.47336	1929.5	18	579.8	12
M2_25_11	107.3	19.4	0.521202	9.92556	0.226588	0.4709	0.004	0.38005	2048.9	21	618.7	14
M2_25_12	78.64	23.66	0.609748	7.42942	0.171108	0.5702	0.0046	0.5027	2484.2	21	814.1	18
M2_25_13	92.76	15.04	0.501698	10.4789	0.241575	0.4513	0.0044	0.53098	1964.5	20	587.5	13
M2_25_14	2.717	28.67	0.946536	0.382995	0.0101213	0.8543	0.0075	0.27495	5868	27	8260	120
M2_25_15	80.05	20.58	0.598726	8.23045	0.189673	0.5423	0.0054	0.6144	2343.8	21	738.9	16
M2_25_16	115.75	19.84	0.478933	10.1947	0.228651	0.4592	0.004	0.48688	2004.3	20	603.2	13
M2_25_17	58.79	26.49	0.736338	5.62746	0.126673	0.6499	0.0052	0.49877	2870.6	22	1054.2	22
M2_25_18	113.56	15.21	0.426638	11.5407	0.266375	0.4113	0.0037	0.50543	1801.3	20	535.6	12
M2_25_19	124.05	15	0.412536	11.9261	0.270239	0.3878	0.0036	0.5823	1724.3	19	519	11
M2_25_20	79.26	16.21	0.530784	9.42418	0.213156	0.4929	0.0046	0.47119	2136.1	21	650.1	14
M2_25_21	94.5	13.05	0.392884	11.2233	0.302312	0.4249	0.0074	0.47843	1852	25	550.2	14
M2_25_22	91.3	16.26	0.457848	9.97009	0.268387	0.4739	0.0082	0.61487	2044	25	616.6	16
M2_25_23	32.34	16.05	0.710501	5.18135	0.147655	0.657	0.011	0.60248	2955	27	1138	30
M2_25_24	82.9	13.36	0.518725	10.4493	0.28389	0.449	0.0078	0.57814	1960	25	589.9	16
M2_25_25	107.5	14.75	0.436916	11.274	0.292335	0.4131	0.006	0.43045	1821	24	547.5	14
Metatexite (JTJ-48B) Lat: 40.987 Long: -6.927
M3_48B_1	45.91	17.63	0.697086	6.3012	0.142938	0.6148	0.0065	0.69478	2710.9	21	949.6	20
M3_48B_10	28.72	14.74	0.754416	5.11771	0.112621	0.6635	0.0051	0.62943	2978.4	21	1150.1	23
M3_48B_2	24.93	13.848	0.715398	4.82625	0.107147	0.6734	0.0063	0.64266	3052.5	21	1213.8	25
M3_48B_3	42.68	16.57	0.675272	6.22665	0.135699	0.6163	0.0045	0.52856	2724	21	960.7	20
M3_48B_4	37.2	16.05	0.701898	5.87544	0.131179	0.6387	0.0054	0.54638	2812.5	21	1013.1	21
M3_48B_5	98.79	15.07	0.472083	10.8519	0.235526	0.4331	0.0029	0.48347	1900.6	18	568.2	12
M3_48B_6	32.83	16.63	0.723829	5.15996	0.111826	0.6582	0.0048	0.48569	2966.2	21	1141.7	23
M3_48B_7	28.53	17.03	0.713731	4.52899	0.102558	0.6849	0.0069	0.67366	3129.7	21	1286	26
M3_48B_9	27.87	13.77	0.759565	5.2356	0.11787	0.6586	0.0065	0.57061	2950.7	22	1126.6	23
M3_48B_11	68.81	20.74	0.627088	7.40138	0.169819	0.5743	0.0046	0.43943	2498	22	816.8	17
M3_48B_12	42.41	18.83	0.69452	5.61482	0.13241	0.6437	0.0061	0.57177	2862.5	22	1056.1	23
M3_48B_13	46.26	22.52	0.729082	5.28541	0.120123	0.6571	0.0054	0.51844	2939.9	22	1116.8	23
M3_48B_18	41.82	18.6	0.601825	7.31529	0.11773	0.5754	0.0056	0.46999	2506.5	16	825.6	13
M3_48B_19	31.48	14.27	0.787231	4.5106	0.0752784	0.6925	0.0069	0.45274	3144.1	16	1292	19
M3_48B_20	51.11	17.79	0.838461	3.89408	0.0682374	0.7135	0.0074	0.44819	3314	17	1473	23
M3_48B_21	27.88	13.54	0.758526	5.3135	0.155283	0.667	0.014	0.63354	2934	28	1110	30
M3_48B_22	67.55	19.11	0.637997	7.72797	0.209026	0.5549	0.009	0.50468	2423	27	785	20
M3_48B_23	20.86	15.88	0.809816	3.75516	0.10858	0.711	0.012	0.49724	3343	29	1520	39
M3_48B_24	27.54	15.99	0.867002	4.66636	0.137182	0.695	0.013	0.58688	3107	28	1250	33
M3_48B_25	54.15	18.81	0.565613	6.80272	0.189736	0.602	0.01	0.58809	2612	25	884	23
Diatexite (JTJ-24A) Lat: 40.882 Long: -7.066
M1_24A_1	150.1	7.55	0.227421	15.9337	0.330048	0.2403	0.0021	0.13963	1141.3	16	392.3	8.1
M1_24A_10	218	13.105	0.26219	15.1423	0.321007	0.263	0.0017	0.36615	1240.6	15	412.3	8.4
M1_24A_2	177.2	10.192	0.245911	15.1676	0.322079	0.2536	0.0021	0.29224	1212.6	16	411.5	8.5
M1_24A_4	137.48	8.034	0.249121	15.3988	0.331973	0.2589	0.0022	0.44002	1216.8	16	405.6	8.4
M1_24A_5	191.7	12.36	0.287098	15.0784	0.341038	0.2822	0.0038	-0.36039	1291	22	413.9	9.4
M1_24A_7	233.6	10.827	0.208878	16.1499	0.339064	0.2249	0.0017	0.46696	1087	15	387.3	8.1
M1_24A_8	139.02	6.633	0.213776	16.3479	0.347429	0.2326	0.0022	0.51412	1101.1	15	382.7	8
M1_24A_11	197.4	6.91	0.167223	17.3611	0.391831	0.1946	0.0023	0.40657	947	15	361	8
M1_24A_12	167.5	7.567	0.201183	16.4285	0.377852	0.2295	0.0026	0.30097	1086.9	16	380.9	8.5
M1_24A_13	185.7	10.51	0.251676	15.4847	0.335685	0.2569	0.0027	0.23482	1206.7	17	403.4	8.8
M1_24A_14	15.3	9.71	0.770566	4.3554	0.11192	0.691	0.01	0.48198	3173	25	1332	31
M1_24A_15	234.2	10.861	0.200752	16.1655	0.365854	0.2267	0.0022	0.3514	1090	16	386.9	8.6
M1_24A_16	254.6	11.02	0.188494	16.4204	0.37748	0.2161	0.0019	0.28359	1049.9	15	381.1	8.3
M1_24A_17	174.98	10.78	0.271901	15.0761	0.340935	0.2693	0.0028	0.48318	1257.8	17	414	9.2
M1_24A_21	99.9	7.43	0.221194	14.3678	0.412868	0.3013	0.0063	0.45552	1370	23	433.8	12
M1_24A_22	83.73	6.19	0.224326	14.3678	0.412868	0.3096	0.0078	0.44882	1385	25	433.3	12
M1_24A_23	190.4	9.25	0.246197	15.9413	0.406602	0.236	0.0037	0.33739	1128	20	392.2	9.9
M1_24A_24	111.2	6.23	0.255856	15.5135	0.433203	0.261	0.0059	0.47722	1210	23	402.6	11
M1_24A_25	60.56	5.12	0.299329	13.7931	0.418549	0.343	0.011	0.44246	1493	29	450.9	13
Diatexite (JTJ-43) ) Lat: 40.887 Long: -6.888
M2_43_1	21.77	7.686	0.644381	6.87285	0.155879	0.5898	0.0064	0.54509	2587.4	21	875.4	18
M2_43_10	31.47	6.884	0.505662	9.19963	0.220046	0.4972	0.0081	0.53906	2161	22	664.9	15
M2_43_2	18.4	6.4	0.608111	6.90608	0.186006	0.59	0.012	0.65984	2582	25	872	22
M2_43_3	38.92	7.932	0.494243	9.52653	0.208736	0.4808	0.005	0.53777	2101.2	20	643.4	14
M2_43_4	49.65	8.072	0.473136	10.755	0.23134	0.4379	0.0044	0.57298	1915.2	19	573.1	12
M2_43_5	49.69	8.181	0.477217	10.6304	0.237311	0.4383	0.0042	0.57547	1926.4	19	579.5	12
M2_43_6	38.84	7.237	0.493386	10.0807	0.223563	0.4737	0.0052	0.65741	2040.4	19	609.6	13
M2_43_7	50.44	9.227	0.505319	10.1533	0.226798	0.459	0.0047	0.61673	2006.2	19	605.5	13
M2_43_8	33.38	7.604	0.546977	8.99281	0.202176	0.5078	0.0048	0.53158	2202.4	20	679.6	14
M2_43_9	18.42	6.767	0.636255	6.72495	0.153765	0.6071	0.0068	0.53748	2636.1	22	893.6	19
M2_43_11	28.39	8.124	0.648941	7.6746	0.188478	0.549	0.0064	0.60086	2415.2	22	789.1	18
M2_43_12	29.27	6.833	0.490312	9.0009	0.218744	0.5175	0.0074	0.62289	2218	22	678.9	16
M2_43_13	46.12	7.393	0.497272	10.8436	0.258686	0.4334	0.0053	0.51316	1900	21	568.5	13
M2_43_14	38.74	7.35	0.462079	9.80873	0.230907	0.4709	0.006	0.52918	2058	22	625.7	14
M2_43_15	33.41	8.166	0.548477	8.5034	0.202462	0.5221	0.0068	0.5844	2278.4	22	716.8	16
M2_43_16	15.21	6.989	0.691508	5.64016	0.143151	0.651	0.01	0.60066	2865	24	1052	24
M2_43_17	33.44	7.718	0.534028	9.04159	0.220726	0.5129	0.0074	0.5413	2206	22	676	16
M2_43_18	62.14	8.93	0.404526	11.3856	0.272228	0.4017	0.005	0.46045	1792	21	542.6	12
M2_43_19	21.12	6.758	0.657094	7.27802	0.1748	0.5779	0.008	0.56849	2515	23	829.5	19
M2_43_20	39.23	8.088	0.518723	9.5057	0.225896	0.4949	0.0063	0.60769	2129.6	21	644.8	15
M2_43_21	41.71	5.56	0.474284	11.8624	0.379934	0.401	0.012	0.44053	1749	32	521	16
M2_43_22	51.06	8.2	0.225477	10.8814	0.319693	0.4305	0.0098	0.55936	1888	27	566.7	16
M2_43_23	57.68	8.56	0.513304	10.977	0.313283	0.4217	0.0095	0.66144	1858	25	561.9	16
M2_43_24	21.34	7.84	0.619183	6.5703	0.211528	0.62	0.016	0.57201	2663	31	912	27
M2_43_25	17.95	7.01	0.866392	6.29327	0.209908	0.618	0.018	0.65386	2692	32	949	29
Diatexite (JTJ-55) Lat: 40.846 Long: -7.178
M3_55_1	131.24	7.301	0.260811	15.7406	0.346873	0.2559	0.0026	0.3551	1192.4	16	397.1	8.4
M3_55_10	114.54	10.543	0.370934	13.4427	0.289129	0.3354	0.0027	0.53609	1513.5	17	462.5	9.6
M3_55_2	156.88	9.777	0.26153	15.1883	0.32296	0.2702	0.0022	0.33859	1256.9	16	411	8.5
M3_55_3	78.46	8.85	0.394764	12.4704	0.264368	0.3829	0.0033	0.51327	1678.7	18	497.2	10
M3_55_4	123.32	8.626	0.269758	14.7189	0.324968	0.2887	0.0028	0.25808	1327.7	17	423.7	8.8
M3_55_5	108.24	9.159	0.33084	13.7703	0.303394	0.3219	0.0027	0.458	1461.6	17	451.9	9.4
M3_55_6	148.21	10.69	0.303225	14.4948	0.315151	0.2949	0.0024	0.50053	1355.3	16	430	8.9
M3_55_7	131.88	8.727	0.285374	14.9768	0.314026	0.2847	0.0024	0.4069	1306.2	16	416.7	8.7
M3_55_8	123.17	9.709	0.317356	14.1824	0.30171	0.3107	0.0026	0.4491	1411.7	17	439.2	9.1
M3_55_9	137.82	9.991	0.309609	14.4655	0.313876	0.2963	0.002	0.48449	1361.1	16	430.9	8.9
M3_55_11	132.54	9.21	0.276107	14.4571	0.334414	0.2884	0.0031	0.46095	1340.5	17	431.1	9.5
M3_55_12	163.3	10.38	0.290422	14.9499	0.33525	0.2782	0.0026	0.39679	1288.7	18	417.3	9.2
M3_55_13	101.25	9.1	0.359968	13.5153	0.31053	0.3401	0.0039	0.40625	1517.2	19	460.1	10
M3_55_14	119.56	11.27	0.365069	13.2855	0.300058	0.3452	0.0038	0.50981	1544.4	19	467.8	10
M3_55_15	131.7	7.714	0.239215	15.6323	0.366555	0.2693	0.0033	0.48017	1231.5	17	399.7	8.9
M3_55_16	145.74	9.71	0.290718	15.0466	0.339602	0.2864	0.0031	0.51178	1304.8	18	414.8	9.1
M3_55_17	128.96	9.8	0.313081	14.497	0.336259	0.3094	0.0034	0.40191	1390.9	18	430	9.6
M3_55_18	150.94	9.62	0.263148	15.1999	0.346554	0.2781	0.0028	0.38018	1275.4	17	410.7	9
M3_55_19	109.35	11.69	0.387341	12.6936	0.290028	0.3688	0.0038	0.48059	1632.3	19	488.8	11
M3_55_20	145.36	10.94	0.322436	14.2207	0.323566	0.3012	0.003	0.48659	1384.8	18	438	9.6
M3_55_21	99	8.45	0.286301	13.8908	0.38591	0.329	0.006	0.50545	1468	23	448	12
M3_55_22	155.8	9.49	0.225484	14.9813	0.403989	0.2678	0.0048	0.48754	1255	21	416.5	11
M3_55_23	137.9	10.3	0.279474	14.4844	0.377634	0.304	0.0053	0.50622	1374	22	430.8	11
M3_55_24	90.82	6.25	0.185203	15.0625	0.431071	0.3029	0.0072	0.45479	1339	23	414.2	11
M3_55_25	145.2	10.47	0.242273	14.4488	0.396658	0.299	0.0051	0.49319	1362	22	431.3	11
	*Pbcm not corrected

## Sheet: DBSG U–Pb detrital zircon 
	Table 3 – LA-ICP-MS U–Pb detrital zircon data of the Douro-Beiras Supergroup.
				Common-lead uncorrected					Final Ages (Ma)
Id	U (ppm)	Th (ppm)	Th/U	207Pb/235U	±2σ	206Pb/238U	±2σ	Rho	207Pb/235U	±2σ	206Pb/238U	±2σ	207Pb/206Pb	±2σ	Concordance (%)*
Douro-Beiras Supergroup North (DBSG N) Lat: 40.992 Long: -6.937
M18_49_65r - 1	266.8	185.2	0.694153	0.662	0.033	0.0845	0.0016	0.15132	508	20	522.5	9.3	410	100	102.854
M18_49_19c - 1	1050	1517	1.44476	0.7437	0.0094	0.08684	0.0024	0.3548	563.8	5.4	536.7	14	675	41	95.1933
M18_49_79c - 1	91	55.7	0.612088	0.72	0.073	0.0912	0.0024	0.084706	530	46	562	14	320	200	106.038
M18_49_101c - 1	82.9	41.3	0.498191	0.775	0.079	0.092	0.0022	0.18526	539	47	566	13	270	200	105.009
M18_49_102c - 1	244.3	56.4	0.230864	0.774	0.034	0.0929	0.0015	0.073164	576	19	572.1	8.9	493	95	99.3229
M18_49_95c - 1	290	293	1.01034	0.793	0.035	0.0932	0.0016	0.1624	587	20	574.3	9.6	545	90	97.8365
M18_49_39c - 1	171.3	137.7	0.803853	0.823	0.044	0.0935	0.0018	0.088701	594	25	576	11	550	120	96.9697
M18_49_45c - 1	49.8	15.12	0.303614	0.85	0.11	0.0937	0.0027	0.14002	556	65	577	16	290	250	103.777
M18_49_23c - 1	2039	281.7	0.138156	0.7742	0.0073	0.09367	0.0025	0.48	582.1	4.1	577.2	15	577	37	99.1582
M18_49_62c - 1	512	547	1.06836	0.772	0.031	0.094	0.0018	0.37098	577	17	579	10	542	79	100.347
M18_49_97c - 1	95.9	92.3	0.962461	0.755	0.071	0.0948	0.0024	0.053342	535	43	583	14	220	190	108.972
M18_49_100c - 1	846	637	0.752955	0.811	0.02	0.0949	0.0012	0.29275	601	11	584.3	7.3	593	54	97.2213
M18_49_89c - 1	181.7	48.5	0.266924	0.768	0.042	0.095	0.002	0.094866	569	26	585	12	440	120	102.812
M18_49_34c - 1	116.5	205.2	1.76137	0.75	0.029	0.0957	0.0029	0.069006	563	17	588.9	17	466	94	104.6
M18_49_3c - 1	899	366	0.407119	0.82	0.016	0.09574	0.0015	0.43829	607.1	9.1	589.3	9	664	32	97.068
M18_49_6c - 1	147.4	49.1	0.333107	0.786	0.027	0.0959	0.0016	0.27123	585	15	590.2	9.6	528	66	100.889
M18_49_58c - 1	78.6	60	0.763359	0.744	0.08	0.0959	0.0025	0.13804	518	49	591	15	180	210	114.093
M18_49_84c - 1	137.5	54.1	0.393455	0.752	0.051	0.0961	0.0019	0.021953	554	30	591	11	340	140	106.679
M18_49_11c - 1	261.4	315.8	1.20811	0.791	0.021	0.09659	0.0015	0.29967	590	12	594.3	8.8	552	48	100.729
M18_49_48c - 1	463	470	1.01512	0.818	0.025	0.0968	0.0014	0.17944	605	14	595.2	8.2	594	67	98.3802
M18_49_82c - 1	542.1	289	0.533112	0.821	0.028	0.0968	0.0014	0.35463	609	16	595.4	8	639	68	97.7668
M18_49_66c - 1	132.8	147.9	1.1137	0.804	0.062	0.0969	0.0023	0.086766	577	35	597	14	400	150	103.466
M18_49_30c - 1	611	228.3	0.37365	0.804	0.011	0.09724	0.0027	0.28426	598.5	6.5	598.1	16	581	44	99.9332
M18_49_50c - 1	452	487.8	1.0792	0.831	0.025	0.0973	0.0014	0.3762	614	13	598.2	8.4	634	61	97.4267
M18_49_73c - 1	149.7	112.9	0.754175	0.825	0.053	0.0975	0.0019	0.1127	605	29	599	11	520	130	99.0083
M18_49_38c - 1	921	452	0.490771	0.882	0.021	0.0976	0.0015	0.29714	641	12	599.8	9	740	51	93.5725
M18_49_83c - 1	114.4	81.1	0.708916	0.794	0.063	0.0976	0.0023	0.15952	567	37	600	13	370	160	105.82
M18_49_105c - 1	571	140.5	0.24606	0.952	0.028	0.0992	0.0015	0.37177	675	15	609.3	8.8	834	61	90.2667
M18_49_53c - 1	759	277	0.364954	0.832	0.037	0.0996	0.0023	0.46804	611	21	612	13	643	82	100.164
M18_49_86c - 1	355	259	0.729577	0.819	0.03	0.0997	0.0017	0.23762	602	17	612	10	523	81	101.661
M18_49_108c - 1	404.1	446.7	1.10542	0.829	0.026	0.0999	0.0015	0.21204	608	15	613.7	8.7	538	69	100.938
M18_49_81c - 1	762	324.9	0.426378	0.835	0.02	0.1001	0.0014	0.36219	616	11	614.9	8.3	611	51	99.8214
M18_49_60c - 1	67.7	51.7	0.763663	0.92	0.1	0.1005	0.0032	0.18072	620	58	618	18	490	230	99.6774
M18_49_61c - 1	430.4	685	1.59154	0.86	0.027	0.1007	0.0016	0.19185	627	15	618.5	9.3	643	72	98.6443
M18_49_46r - 1	123.7	40.9	0.330639	0.886	0.06	0.1014	0.0022	0.13738	625	33	622	13	520	140	99.52
M18_49_54c - 1	827	32.18	0.0389117	0.842	0.021	0.1015	0.0015	0.28953	617	12	623	9	628	52	100.972
M18_49_74c - 1	158	108.6	0.687342	0.832	0.053	0.1015	0.002	0.20622	597	30	623	12	430	130	104.355
M18_49_88c - 1	824	521	0.632282	0.885	0.023	0.1018	0.0015	0.26867	641	13	625	8.8	660	57	97.5039
M18_49_59c - 1	684	294	0.429825	0.854	0.021	0.102	0.0015	0.3106	623	11	625.8	8.7	605	53	100.449
M18_49_94c - 1	143.6	133	0.926184	0.872	0.056	0.1023	0.0025	0.067385	621	31	627	14	490	140	100.966
M18_49_27c - 1	160.3	213.3	1.33063	0.866	0.024	0.1024	0.0029	0.14739	630	13	628.5	17	604	69	99.7619
M18_49_35c - 1	338.6	154.7	0.456881	0.833	0.016	0.10245	0.0028	0.13675	613.9	9.1	628.6	17	571	55	102.395
M18_49_90c - 1	462	301	0.651515	0.866	0.026	0.1025	0.0014	0.19896	630	14	629	8.4	577	68	99.8413
M18_49_72c - 1	408	253	0.620098	0.872	0.033	0.1027	0.0016	0.30861	628	18	630	9.5	599	76	100.318
M18_49_42c - 1	584	555	0.950342	0.928	0.024	0.1027	0.0015	0.29594	664	13	630.2	8.5	731	52	94.9096
M18_49_56c - 1	166	77.5	0.466867	0.841	0.047	0.1033	0.0019	0.069657	603	26	633	11	460	120	104.975
M18_49_98c - 1	123.2	79.4	0.644481	0.828	0.063	0.1036	0.0021	-0.0047848	598	36	635	12	310	160	106.187
M18_49_96c - 1	118.3	82.7	0.69907	0.91	0.067	0.104	0.0022	0.26776	624	37	637	13	450	150	102.083
M18_49_16c - 1	292	153	0.523973	0.892	0.022	0.1039	0.0016	0.2103	646	12	637.3	9.4	677	44	98.6533
M18_49_69c - 1	438	530	1.21005	0.938	0.033	0.1055	0.0017	0.26569	667	17	646.4	9.9	703	73	96.9115
M18_49_22c - 1	447	202.4	0.452796	0.896	0.016	0.1059	0.003	0.23889	648	8.4	648.9	18	623	50	100.139
M18_49_21c - 1	361.8	233.9	0.64649	0.888	0.017	0.10593	0.0029	0.28974	643	9	649	17	595	51	100.933
M18_49_26c - 1	1002	266	0.265469	0.907	0.012	0.1059	0.003	0.55872	654.5	6.2	649	17	658	38	99.1597
M18_49_76c - 1	144.5	94.1	0.651211	0.859	0.065	0.106	0.0028	0.011942	615	36	649	16	440	170	105.528
M18_49_77c - 1	529.4	792	1.49603	0.947	0.033	0.106	0.0018	0.37178	671	18	649	11	748	70	96.7213
M18_49_4c - 1	964	588	0.609959	0.879	0.015	0.10682	0.0015	0.36438	640	8.1	654.2	9	583	25	102.219
M18_49_71c - 1	2357	191	0.0810352	0.938	0.014	0.1084	0.0013	0.49724	670.2	7.5	663.1	7.8	693	30	98.9406
M18_49_91c - 1	1684	1063	0.631235	0.937	0.015	0.1085	0.0013	0.41528	671.3	8.3	663.9	7.7	655	34	98.8977
M18_49_5c - 1	188	162	0.861702	0.886	0.037	0.1086	0.0023	0.023727	640	20	664	13	515	94	103.75
M18_49_36c - 1	252	314	1.24603	0.92	0.051	0.1085	0.0031	0.18491	656	27	664	18	600	130	101.22
M18_49_31c - 1	80.6	54.71	0.678784	0.904	0.05	0.1098	0.0036	0.12936	647	28	671	21	530	130	103.709
M18_49_103c - 1	302	44.2	0.146358	0.963	0.035	0.1102	0.0017	0.31575	680	18	673.4	9.9	605	77	99.0294
M18_49_1c - 1	565.5	478.3	0.8458	1.087	0.046	0.1102	0.0018	0.14669	740	21	673.7	10	912	78	91.0405
M18_49_51c - 1	70.2	12.58	0.179202	0.901	0.082	0.1104	0.0028	0.010429	622	44	674	16	320	180	108.36
M18_49_92c - 1	356.5	79.2	0.22216	0.971	0.036	0.1115	0.0019	0.28707	680	19	681	11	595	77	100.147
M18_49_78c - 1	919	167.9	0.182699	0.986	0.023	0.1135	0.0013	0.45412	693	12	693	7.5	698	44	100
M18_49_12c - 1	289	183.8	0.635986	1.076	0.027	0.1202	0.002	0.3289	739	13	731.5	12	760	44	98.9851
M18_49_87c - 1	139.7	70	0.501074	1.066	0.068	0.1236	0.0027	0.31498	721	35	751	15	530	130	104.161
M18_49_49c - 1	346	97.6	0.282081	1.292	0.037	0.1361	0.0023	0.25536	839	17	822	13	869	62	97.9738
M18_49_32c - 1	143.5	120.9	0.842509	1.253	0.027	0.141	0.004	0.24625	823	12	849.9	22	744	55	103.269
M18_49_63c - 1	498	1319	2.64859	1.433	0.052	0.1462	0.0033	0.6313	902	21	879	18	938	61	97.4501
M18_49_106c - 1	529.3	414.8	0.783677	1.435	0.036	0.15	0.0019	0.25334	898	15	901	11	856	50	100.334
M18_49_67c - 1	154.1	35.94	0.233225	1.432	0.066	0.1517	0.0028	0.23329	892	28	910	16	793	98	102.018
M18_49_64c - 1	119.1	80.7	0.677582	1.595	0.079	0.1539	0.0026	0.14737	944	31	922	15	930	110	97.6695
M18_49_70c - 1	400.4	347	0.866633	1.484	0.055	0.1549	0.0034	0.20579	918	23	928	19	881	88	101.089
M18_49_2c - 1	205.3	72.4	0.352655	1.563	0.045	0.1621	0.003	0.22724	952	18	968	17	902	55	101.681
M18_49_44c - 1	155.7	96.7	0.621066	1.655	0.06	0.1621	0.0026	0.17306	978	24	968	15	953	78	98.9775
M18_49_14c - 1	2001	197.4	0.0986507	1.655	0.025	0.1629	0.0023	0.60943	990.8	9.4	972.5	13	1034	15	98.153
M18_49_68c - 1	184.6	267	1.44637	1.586	0.064	0.1636	0.0028	0.25619	955	25	976	16	869	86	102.199
M18_49_70r - 1	71.3	23.43	0.328612	1.68	0.11	0.1658	0.0036	0.1495	956	43	989	20	790	140	103.452
M18_49_24c - 1	295.3	356.4	1.20691	1.651	0.035	0.1677	0.0049	0.37054	990	14	999	27	956	55	100.909
M18_49_10c - 1	455.5	299.6	0.657739	1.699	0.03	0.1693	0.0025	0.3789	1006.4	11	1007.7	14	1000	25	100.77
M18_49_85c - 1	128.4	39.9	0.310748	1.72	0.08	0.1711	0.0034	0.21052	999	30	1017	18	911	97	111.636
M18_49_80r - 1	191.6	116.8	0.609603	1.75	0.062	0.1743	0.0027	0.25182	1019	23	1035	15	975	71	106.154
M18_49_80c - 1	250	284	1.136	1.845	0.058	0.1818	0.0029	0.36372	1053	21	1076	16	1022	64	105.284
M18_49_18c - 1	82.2	23.08	0.280779	2.232	0.066	0.1978	0.0034	0.30264	1182	21	1163	18	1212	54	95.9571
M18_49_99c - 1	171.2	57.3	0.334696	3.372	0.088	0.2618	0.0045	0.28654	1493	21	1497	23	1435	53	100.268
M18_49_47c - 1	99.8	45.6	0.456914	4.73	0.16	0.3023	0.0055	0.44482	1756	28	1700	27	1814	55	93.7155
M18_49_15c - 1	234.6	28.6	0.12191	5.103	0.085	0.3173	0.0047	0.43534	1836.1	14	1776	23	1908	19	93.0818
M18_49_55c - 1	227.4	209.8	0.922603	5.07	0.11	0.3176	0.0049	0.34888	1832	18	1776	24	1904	39	93.2773
M18_49_25c - 1	266.2	112	0.420736	5.847	0.07	0.3512	0.0098	0.48839	1951	10	1939	47	1948	33	99.538
M18_49_57c - 1	284.3	182.5	0.641928	5.83	0.13	0.353	0.0059	0.45855	1955	19	1947	28	1967	36	98.9832
M18_49_8c - 1	329.4	102.8	0.312083	6.7	0.14	0.3723	0.0067	0.52153	2070	19	2040	31	2100	28	97.1429
M18_49_104c - 1	104.5	112.2	1.07368	7.87	0.18	0.3839	0.0063	0.39153	2206	21	2092	29	2276	39	91.9156
M18_49_43c - 1	1279	599	0.468335	7.29	0.1	0.3854	0.005	0.63474	2145	12	2100	23	2166	20	96.9529
M18_49_52c - 1	264.3	84.6	0.320091	7.3	0.13	0.3893	0.0052	0.50603	2145	17	2118	24	2165	29	97.8291
M18_49_29c - 1	2455	515	0.209776	7.111	0.05	0.3934	0.011	0.69564	2125	6.4	2138	49	2101.4	27	101.742
M18_49_107c - 1	112.5	34.5	0.306667	22.44	0.45	0.634	0.012	0.53942	3196	20	3166	46	3209	29	98.66
Douro-Beiras Supergroup South (DBSG S) Lat: 40.850 Long: -6.838
M18_41b_56c - 1	745	163.5	0.219463	0.722	0.012	0.08173	0.0023	0.32243	551.4	7.3	506.4	13	718	46	91.839
M18_41b_100c - 1	246.9	106.3	0.430539	0.665	0.017	0.08311	0.0023	0.23265	515	11	515.1	14	508	66	100.019
M18_41b_18c - 1	318.2	155.7	0.489315	0.679	0.019	0.08459	0.0014	0.18664	524	11	523.4	8.2	476	55	99.8855
M18_41b_105c - 1	524	135.2	0.258015	0.693	0.012	0.08557	0.0024	0.45093	534	7.5	529.2	14	566	46	99.1011
M18_41b_68c - 1	170.1	60.46	0.355438	0.68	0.019	0.0866	0.0025	0.095396	524	12	535.4	15	473	71	102.176
M18_41b_107c - 1	589	149.8	0.254329	0.694	0.013	0.08663	0.0025	0.15677	533.9	8	535.5	15	527	55	100.3
M18_41b_39c - 1	486.3	138.2	0.284187	0.699	0.018	0.087	0.0015	0.22749	537	11	537.5	9	514	53	100.093
M18_41b_95c - 1	1061	157.3	0.148256	0.738	0.011	0.08754	0.0025	0.3929	560.5	6.4	540.9	15	646	44	96.5031
M18_41b_88c - 1	459.6	88.9	0.193429	0.707	0.012	0.08825	0.0024	0.24708	542.5	7.1	545.1	14	507	49	100.479
M18_41b_87c - 1	241.3	68.5	0.283879	0.716	0.023	0.0891	0.0026	0.23831	548	14	550	15	500	76	100.365
M18_41b_108c - 1	252.3	57.04	0.22608	0.71	0.017	0.08918	0.0025	0.23108	543	10	550.5	15	505	61	101.381
M18_41b_8c - 1	131.9	55.1	0.417741	0.718	0.029	0.0895	0.0017	0.19256	543	17	552.1	9.8	459	82	101.676
M18_41b_89c - 1	528	209.3	0.396402	0.726	0.011	0.08944	0.0025	0.37759	552.9	6.4	552.1	15	541	44	99.8553
M18_41b_34c - 1	1315	266	0.202281	0.738	0.013	0.08953	0.0013	0.39232	560.5	7.5	552.7	7.6	575	25	98.6084
M18_41b_8r - 1	364.5	20.33	0.055775	0.736	0.017	0.08963	0.0014	0.28209	558	10	553.2	8.2	546	43	99.1398
M18_41b_46c - 1	1199	409.2	0.341284	0.7197	0.012	0.09043	0.0013	0.44021	549.8	7.3	558	7.7	499	25	101.491
M18_41b_101c - 1	1962	183.4	0.093476	0.727	0.0068	0.09044	0.0025	0.511	554.4	4	558	15	556	36	100.649
M18_41b_47c - 1	344	73.33	0.213169	0.723	0.017	0.09047	0.0014	0.12489	552.1	11	558.2	8.2	497	48	101.105
M18_41b_63c - 1	626.8	93.8	0.149649	0.756	0.011	0.09063	0.0025	0.23135	570.7	6.2	559.1	15	591	45	97.9674
M18_41b_22c - 1	324.5	134.6	0.414792	0.742	0.02	0.09064	0.0014	0.20713	561	12	559.2	8.5	537	54	99.6791
M18_41b_48c - 1	1045	205.8	0.196938	0.745	0.017	0.0907	0.0014	0.20144	564	9.8	559.6	8.4	569	43	99.2199
M18_41b_49c - 1	1315	250.5	0.190494	0.7368	0.012	0.09072	0.0013	0.40918	560.6	7.4	559.8	7.9	553	25	99.8573
M18_41b_6c - 1	806	123.5	0.153226	0.748	0.017	0.0908	0.0017	0.26957	566.1	9.7	559.9	10	578	44	98.9048
M18_41b_36c - 1	2417	1047	0.433182	0.7497	0.012	0.09078	0.0013	0.50714	567.7	6.9	560.1	7.8	585	19	98.6613
M18_41b_50c - 1	1716	505	0.294289	0.7312	0.012	0.09109	0.0013	0.39655	556.6	7.3	561.9	8	518	24	100.952
M18_41b_15r - 1	39.58	10.84	0.273876	0.699	0.064	0.0914	0.002	-0.11018	516	37	563	12	230	170	109.109
M18_41b_67c - 1	271.1	82.7	0.305053	0.737	0.018	0.09132	0.0025	0.22785	558	10	563.2	15	525	60	100.932
M18_41b_14r - 1	152.9	48.4	0.316547	0.773	0.028	0.0916	0.0017	0.24745	576	16	564.6	9.8	558	73	98.0208
M18_41b_96c - 1	767	104.3	0.135984	0.7368	0.009	0.09163	0.0025	0.32023	559.8	5.3	565.1	15	543	42	100.947
M18_41b_62c - 1	225.1	62.4	0.27721	0.772	0.019	0.09165	0.0026	0.10499	578	11	565.1	15	582	61	97.7682
M18_41b_120c - 1	2870	353.3	0.123101	0.7422	0.0067	0.09171	0.0025	0.49308	563.3	3.9	565.6	15	552	36	100.408
M18_41b_94c - 1	2561	780	0.304569	0.7426	0.0067	0.09188	0.0025	0.49023	563.5	3.9	566.6	15	560	36	100.55
M18_41b_52r - 1	456.8	97.9	0.214317	0.758	0.013	0.09207	0.0025	0.19105	571.1	7.7	567.7	15	573	50	99.4047
M18_41b_24c - 1	1101	80.6	0.0732062	0.737	0.014	0.09219	0.0014	0.36272	559.5	8.4	568.4	8.3	490	32	101.591
M18_41b_52c - 1	1044	356	0.340996	0.813	0.01	0.09223	0.0025	0.37225	603.3	5.6	569.1	15	733	39	94.3312
M18_41b_81c - 1	1275	202.3	0.158667	0.7414	0.0076	0.09286	0.0025	0.43119	563.1	4.5	572.4	15	512	38	101.652
M18_41b_58c - 1	277.7	102	0.367303	0.773	0.019	0.09287	0.0026	0.26437	579	11	572.4	15	550	61	98.8601
M18_41b_118c - 1	816	57.9	0.0709559	0.744	0.01	0.09289	0.0026	0.31335	563.8	6.1	572.5	15	519	44	101.543
M18_41b_115c - 1	3284	1365	0.415652	0.7455	0.006	0.09291	0.0025	0.58811	565.3	3.5	573.1	15	544	35	101.38
M18_41b_102c - 1	160.4	42.5	0.264963	0.766	0.024	0.093	0.0026	0.11646	572	14	573.3	16	545	77	100.227
M18_41b_14c - 1	110.7	32.01	0.28916	0.756	0.029	0.0932	0.0016	0.16345	565	17	574.3	9.4	485	76	101.646
M18_41b_15c - 1	172.3	93.7	0.543819	0.775	0.027	0.09336	0.0015	0.044542	579	15	575.3	8.6	527	72	99.361
M18_41b_72c - 1	554	139.1	0.251083	0.738	0.012	0.09357	0.0026	0.30637	559.9	6.9	576.5	15	501	47	102.965
M18_41b_16r - 1	1040	258.3	0.248365	0.787	0.014	0.09363	0.0014	0.38504	588.6	8.1	576.9	8	600	28	98.0122
M18_41b_19c - 1	1162	244.1	0.210069	0.759	0.014	0.09369	0.0014	0.3641	573.2	7.9	577.9	8.5	517	30	100.82
M18_41b_16c - 1	1108	245.3	0.22139	0.757	0.013	0.09383	0.0014	0.27341	571.6	7.5	578.1	8	513	27	101.137
M18_41b_1c - 1	214.2	37	0.172736	0.766	0.024	0.094	0.0016	0.22464	574	14	578.8	9.5	529	64	100.836
M18_41b_64c - 1	265.4	76.6	0.288621	0.767	0.027	0.094	0.0028	0.1353	575	16	579.3	17	532	90	100.748
M18_41b_21c - 1	167.5	365.9	2.18448	0.766	0.025	0.0942	0.0016	0.19773	573	14	580.1	9.4	481	65	101.239
M18_41b_65c - 1	168	55.6	0.330952	0.772	0.021	0.0943	0.0027	0.23244	578	12	581.3	16	536	67	100.571
M18_41b_106c - 1	145.2	52	0.358127	0.765	0.024	0.0946	0.0027	0.12815	573	14	582.8	16	517	74	101.71
M18_41b_73c - 1	162.9	35.1	0.21547	0.745	0.021	0.09476	0.0026	0.17204	561	13	583.5	16	454	71	104.011
M18_41b_110c - 1	830	327	0.393976	0.782	0.012	0.09496	0.0026	0.38168	585.5	6.6	584.7	15	585	42	99.8634
M18_41b_112c - 1	324.3	117.2	0.361394	0.761	0.014	0.09482	0.0026	0.36394	573.6	8.4	584.9	16	526	51	101.97
M18_41b_103c - 1	474	81.3	0.171519	0.771	0.012	0.09505	0.0026	0.20858	579.1	6.9	585.2	15	566	47	101.053
M18_41b_82c - 1	125.9	23.4	0.185862	0.764	0.027	0.0953	0.0028	0.25812	572	15	586.7	16	459	80	102.57
M18_41b_71c - 1	460.7	99.9	0.216844	0.797	0.019	0.0955	0.0028	0.30998	595	11	588	16	629	61	98.8235
M18_41b_28c - 1	209	32.55	0.155742	0.77	0.025	0.0956	0.0015	0.15449	577	14	588.3	9	472	70	101.958
M18_41b_116c - 1	353	103.3	0.292635	0.781	0.013	0.09561	0.0026	0.28715	584.6	7.4	588.6	16	573	49	100.684
M18_41b_113c - 1	278.7	91	0.326516	0.836	0.019	0.09562	0.0027	0.14592	615	11	588.6	16	699	60	95.7073
M18_41b_119c - 1	302	45.7	0.151325	0.777	0.018	0.0962	0.0027	0.30803	581	10	592.2	16	523	57	101.928
M18_41b_83c - 1	248	63.29	0.255202	0.781	0.025	0.0964	0.0028	0.28829	583	14	593.2	16	497	72	101.75
M18_41b_80c - 1	374.8	61.3	0.163554	0.771	0.014	0.09645	0.0027	0.36078	579.6	8.1	593.5	16	502	50	102.398
M18_41b_9c - 1	287	31.3	0.109059	0.79	0.023	0.0966	0.0017	0.2766	589	13	594.2	9.9	553	59	100.883
M18_41b_43c - 1	359	92.5	0.25766	0.796	0.018	0.09701	0.0015	0.20497	593.2	11	596.8	8.5	549	44	100.607
M18_41b_104c - 1	1174	572	0.487223	0.7877	0.0093	0.09704	0.0027	0.47337	589.6	5.4	597	16	573	40	101.255
M18_41b_7c - 1	322	119.3	0.370497	0.799	0.022	0.0971	0.0016	0.25305	594	12	597.1	9.4	564	52	100.522
M18_41b_77c - 1	95.8	19.38	0.202296	0.795	0.032	0.0973	0.0028	0.13917	587	18	598.6	16	490	92	101.976
M18_41b_99c - 1	747	95.7	0.128112	0.803	0.014	0.0979	0.0028	0.43114	598.9	7.7	602	16	593	46	100.518
M18_41b_37c - 1	1381	544	0.393917	0.791	0.015	0.09844	0.0015	0.47829	590.9	8.7	605.2	8.8	513	30	102.42
M18_41b_11c - 1	484	383	0.791322	0.834	0.019	0.0985	0.0016	0.25994	615.5	11	605.6	9.3	627	40	98.3916
M18_41b_38c - 1	183.3	92.7	0.505728	0.828	0.026	0.0987	0.0016	0.073538	610	15	606.9	9.3	575	68	99.4918
M18_41b_69c - 1	163.8	35.91	0.219231	0.786	0.025	0.0988	0.0028	0.14002	588	14	607.1	17	483	78	103.248
M18_41b_85c - 1	2672	1912	0.715569	0.82	0.011	0.0989	0.0028	0.47665	607.4	6.3	608.1	16	578	41	100.115
M18_41b_53c - 1	2980	2331	0.782215	0.8262	0.0084	0.09923	0.0027	0.54589	611.1	4.7	609.8	16	614	37	99.7873
M18_41b_45c - 1	2176	817	0.37546	0.8214	0.014	0.09948	0.0016	0.66029	608.1	7.7	611.2	9.2	585	20	100.51
M18_41b_98c - 1	149.4	58.91	0.394311	0.807	0.022	0.0996	0.0028	0.11493	601	13	611.8	16	551	69	101.797
M18_41b_66c - 1	999	252.4	0.252653	0.8366	0.0098	0.09965	0.0027	0.015427	616.5	5.4	612.3	16	624	41	99.3187
M18_41b_109c - 1	702	1154	1.64387	0.864	0.02	0.1003	0.0028	0.37189	630	11	616	17	690	53	97.7778
M18_41b_23c - 1	872	240	0.275229	0.85	0.017	0.1003	0.0016	0.24662	623.4	9.5	616.1	9.3	622	36	98.829
M18_41b_30c - 1	1856	592	0.318966	0.8342	0.013	0.10045	0.0015	0.55896	615.4	7.2	617	8.5	588	18	100.26
M18_41b_55c - 1	540.2	695.4	1.2873	0.856	0.014	0.10072	0.0028	0.30866	627.4	7.4	618.5	16	646	46	98.5814
M18_41b_51c - 1	388.6	173.2	0.445703	0.84	0.018	0.10099	0.0016	0.34182	617.4	9.8	620.1	9.2	588	36	100.437
M18_41b_84c - 1	1510	1700	1.12583	0.845	0.012	0.101	0.0029	0.48689	621.1	6.8	620.3	17	606	44	99.8712
M18_41b_25c - 1	336	170.1	0.50625	0.968	0.03	0.1012	0.0016	0.30229	684	15	621.5	9.7	851	57	90.8626
M18_41b_97c - 1	440	192.7	0.437955	0.825	0.014	0.10128	0.0028	0.3006	609.1	7.6	621.8	16	574	49	102.085
M18_41b_33c - 1	229.2	107.2	0.467714	0.858	0.022	0.1016	0.0017	0.19063	629	12	623.4	9.9	627	50	99.1097
M18_41b_27c - 1	354.7	549	1.54779	0.855	0.022	0.1021	0.0016	0.26895	626	12	626.9	9.4	590	48	100.144
M18_41b_75c - 1	183.8	104.9	0.570729	0.85	0.023	0.1029	0.0029	0.15152	621	12	631.3	17	579	65	101.659
M18_41b_61c - 1	621	200	0.322061	0.935	0.018	0.1031	0.003	0.47708	669.6	9.7	632.7	17	749	49	94.4892
M18_41b_41c - 1	318.5	97.2	0.305181	0.855	0.019	0.10344	0.0016	0.29452	625.1	11	634.4	9.3	571	41	101.488
M18_41b_31c - 1	277.3	47.1	0.169852	0.882	0.021	0.1044	0.0016	0.22907	640.8	11	639.7	9.5	621	45	99.8283
M18_41b_70c - 1	329	76.2	0.231611	0.86	0.016	0.1051	0.003	0.18253	628	8.7	644	17	576	52	102.548
M18_41b_121c - 1	132.6	98.3	0.741327	0.897	0.041	0.1053	0.0032	0.17449	643	22	645.2	19	590	110	100.342
M18_41b_79c - 1	149	166.4	1.11678	0.894	0.024	0.1063	0.003	0.22821	645	13	651.1	18	607	66	100.946
M18_41b_74c - 1	470	264.8	0.563404	0.861	0.014	0.1065	0.003	0.32548	630.7	8.1	652.4	17	564	47	103.441
M18_41b_11r - 1	1989	292.5	0.147059	0.8993	0.014	0.10651	0.0015	0.5056	650.7	7.6	652.4	8.7	623	19	100.261
M18_41b_44c - 1	238	121	0.508403	0.915	0.024	0.1078	0.0017	0.24524	656	12	659.6	9.6	612	49	100.549
M18_41b_111c - 1	284.6	191	0.671117	0.888	0.017	0.1099	0.0031	0.26246	643.2	9.1	671.9	18	548	53	104.462
M18_41b_90c - 1	273.5	118	0.431444	0.951	0.018	0.11162	0.0031	0.079004	677.4	9.5	682	18	644	55	100.679
M18_41b_86c - 1	301.1	119.2	0.395882	1.019	0.025	0.1166	0.0033	0.30866	711	13	711.1	19	671	61	100.014
M18_41b_33r - 1	3609	139.5	0.0386534	0.97	0.018	0.1191	0.0019	0.6553	687.7	9.1	725.5	11	528	23	105.497
M18_41b_26c - 1	197	78.5	0.398477	1.056	0.027	0.1203	0.002	0.29039	728	14	732.2	11	677	48	100.577
M18_41b_32c - 1	380.4	124.3	0.326761	1.276	0.027	0.1376	0.0023	0.36958	834	12	831	13	820	36	99.6403
M18_41b_114c - 1	210.9	75.9	0.359886	1.295	0.056	0.1461	0.0047	0.54026	839	24	879	26	738	86	104.768
M18_41b_57c - 1	319	212	0.664577	1.623	0.025	0.1626	0.0045	0.36723	978	10	970.9	25	973	43	99.274
M18_41b_5c - 1	161	52.7	0.327329	1.648	0.038	0.1669	0.0026	0.37577	985	15	994.7	14	947	39	100.985
M18_41b_92c - 1	182.5	174.6	0.956712	1.707	0.03	0.1698	0.0047	0.24744	1010	11	1010.9	26	1007	49	100.387
M18_41b_13c - 1	203.6	108.2	0.531434	6.402	0.11	0.3646	0.0055	0.5819	2030	15	2003	26	2041	17	98.1382
M18_41b_3c - 1	178.2	60.6	0.340067	6.263	0.1	0.3647	0.0056	0.44616	2012	14	2003	26	2013	19	99.5032
M18_41b_13r - 1	710.2	101.7	0.143199	6.487	0.097	0.369	0.0052	0.67675	2042.6	13	2024	25	2041	11	99.1671
M18_41b_117c - 1	1535	366	0.238436	6.3	0.048	0.37	0.01	0.61582	2017.6	6.7	2029	48	2005	28	101.197
M18_41b_91r - 1	282.7	40.1	0.141846	10.36	0.11	0.4449	0.012	0.60643	2465.8	9.4	2372	54	2548	28	93.0926
M18_41b_40c - 1	578	273	0.472318	13	0.19	0.5297	0.0076	0.7229	2679.1	14	2739	32	2624	9.6	104.383
M18_41b_2c - 1	87.6	45.5	0.519406	13.7	0.23	0.5332	0.0083	0.52104	2729	15	2753	35	2701	17	101.925
M18_41b_17c - 1	178.1	102.2	0.573835	22.63	0.34	0.6491	0.0098	0.64338	3210.8	15	3223	38	3186	12	101.161
M18_41b_10c - 1	865	130.6	0.150983	30.06	0.73	0.723	0.018	0.71707	3486	24	3505	66	3450	23	101.594
	*Concordance = (206Pb/238U age) / (207Pb/235U age) x 100 – for ages <1000 Ma = (206Pb/238U age) / (207Pb/206Pb age) x 100 – for ages >1000 Ma
